# Supplementary material
Source: PubMed Central journal article supplement (PMC3932302)
Supplement: NIHMS549308-supplement-2.pdf [file NIHMS549308-supplement-2.pdf]

## **Supplementary Tables to:**

Cellular uptake of imatinib into leukemic cells is independent of human organic cation transporter 1 (OCT1)

Anne T. Nies, Elke Schaeffeler, Heiko van der Kuip, Ingolf Cascorbi, Oliver Bruhn, Michael Kneba, Christiane Pott, Ute Hofmann, Christopher Volk, Shuiying Hu, Sharyn D. Baker, Alex Sparreboom, Peter Ruth, Hermann Koepsell, Matthias Schwab

**Supplementary Table S1.** Overview of conflicting reports regarding the importance of OCT1 genetics, OCT1 expression, or cellular imatinib uptake for imatinib pharmacokinetics and response

| OCT1 genetics | Reference             | OCT1 variant                                                                                                         | Number of patients | Effects on imatinib response                    | Effects on imatinib pharmacokinetics            | Significant association |
|---------------|-----------------------|----------------------------------------------------------------------------------------------------------------------|--------------------|-------------------------------------------------|-------------------------------------------------|-------------------------|
|               | Zach et al. (1)       | rs12208357<br>(c.181C>T, p.R61C)                                                                                     | 32                 | No effect on MMR                                | No effect on steady state imatinib plasma level | No                      |
|               | Kim et al. (2)        | rs683369<br>(c.480G>C, p.L160F)                                                                                      | 229                | Higher rate of loss of response                 |                                                 | Yes                     |
|               | Gromicho et al. (3)   | rs683369<br>(c.480G>C, p.L160F)                                                                                      | 33                 | No correlation with treatment response          |                                                 | No                      |
|               | Bazeos et al. (4)     | rs3413049<br>(c.1201G>A, p.G401S)                                                                                    | 60                 | Higher rate of MMR                              |                                                 | Yes                     |
|               | Takahashi et al. (5)  | rs628031<br>(c.1222A>G, p.M408V)                                                                                     | 62                 | Higher rate of MMR                              |                                                 | Yes                     |
|               |                       | rs628031<br>(c.1222A>G, p.M408V)                                                                                     | 62                 |                                                 | No effect on C <sub>minutes</sub>               | No                      |
|               | White et al. (6)      | rs12208357<br>(c.181C>T, p.R61C)<br>rs72552763<br>(c.1260_1262delGAT, p.M420del)<br>and others                       | 136                | No effect on MMR                                |                                                 | No                      |
|               | Maffioli et al. (7)   | rs12208357<br>(c.181C>T, p.R61C)<br>rs72552763<br>(c.1260_1262delGAT, p.M420del)<br>rs628031<br>(c.1222A>G, p.M408V) | 65                 | No correlation with overall inadequate response |                                                 | No                      |
|               |                       | rs6935207<br>(c.-105-1690G>A)                                                                                        | 65                 | Correlation with overall inadequate response    |                                                 | Yes                     |
|               | Giannoudis et al. (8) | rs35191146<br>(c.1260_1262delGAT, p.M420del)                                                                         | 177                | Higher risk of treatment failure                |                                                 | Yes                     |
|               | Angelini et al. (9)   | combination of several alleles                                                                                       | 189                | Higher rate of MMR                              |                                                 | Yes                     |
|               | Seong et al. (10)     | rs2282143<br>(c.1022C>T, p.P341L)                                                                                    | 82                 | No effect on CCR or MMR                         | No effect on imatinib trough concentration      | No                      |
|               | Nambu et al. (11)     | rs2282143<br>(c.1022C>T, p.P341L)                                                                                    | 15                 |                                                 | No effect on steady state imatinib plasma level | No                      |
|               | Yamakawa et al.       | rs2282143                                                                                                            | 34                 |                                                 | No effect on imatinib                           | No                      |

|                                 |                        |                                                                                 |                           |                                                                                                                                                                                                                                                |                                                 |                                |
|---------------------------------|------------------------|---------------------------------------------------------------------------------|---------------------------|------------------------------------------------------------------------------------------------------------------------------------------------------------------------------------------------------------------------------------------------|-------------------------------------------------|--------------------------------|
|                                 | (12)                   | (c.1022C>T, p.P341L)                                                            |                           |                                                                                                                                                                                                                                                | clearance                                       |                                |
|                                 | Singh et al. (13)      | Haplotype of rs3798168, rs628031 (c.1222A>G, p.M408V), rs80301372 (IVS7+850C>T) | 38                        |                                                                                                                                                                                                                                                | Significant association with imatinib clearance | Yes                            |
| <b>OCT1/SLC22A1 mRNA level</b>  | <b>Reference</b>       | <b>Cell type</b>                                                                | <b>Number of patients</b> | <b>Effects on imatinib response</b>                                                                                                                                                                                                            |                                                 | <b>Significant association</b> |
|                                 | Crossman et al. (14)   | BM MNC                                                                          | 15                        | 8-fold higher pre-treatment OCT1 mRNA levels in patients who achieved CCR by 12 months of imatinib treatment than non-responders                                                                                                               |                                                 | Yes                            |
|                                 | Wang et al. (15)       | PBC                                                                             | 70                        | High pre-treatment OCT1 mRNA levels associated with significantly better overall and progression-free survival rates than low OCT1 levels<br>Note: this association is lost when primers are used that do not cover OCT1 variant rs35191146(8) |                                                 | (Yes)/No                       |
|                                 | Zhang et al. (16)      | PBC                                                                             | 68                        | No difference in OCT1 mRNA levels at time of diagnosis between patients achieving CCR by 12 months of imatinib therapy or not achieving CCR                                                                                                    |                                                 | No                             |
|                                 | Marin et al. (17)      | PBC                                                                             | 60                        | High OCT1 mRNA at time of diagnosis in patients with CP-CML associated with better rates of MMR and CMR by 6 years of imatinib treatment                                                                                                       |                                                 | Yes                            |
|                                 | White et al. (18)      | PB MNC                                                                          | 56                        | No difference in achieving MMR between patients with high or low OCT1 mRNA levels at time of diagnosis                                                                                                                                         |                                                 | No                             |
|                                 | White et al. (19)      | PB MNC                                                                          | 46                        | No difference in achieving MMR or CMR between patients with high or low OCT1 mRNA levels at time of diagnosis                                                                                                                                  |                                                 | No                             |
|                                 | Zhong et al. (20)      | BM MNC                                                                          | 84                        | Higher OCT1 mRNA levels in patients achieving CCR than in non-responders                                                                                                                                                                       |                                                 | Yes                            |
|                                 | Nardinelli et al. (21) | PBC                                                                             | 88                        | High OCT1 mRNA at time of diagnosis in patients with CP-CML associated with higher rates of MMR by 12 and 18 months of imatinib treatment                                                                                                      |                                                 | Yes                            |
|                                 | Gromicho et al. (3)    | PB MNC, BM MNC                                                                  | 33                        | Higher OCT1 mRNA levels in patients sensitive to imatinib treatment                                                                                                                                                                            |                                                 | Yes                            |
| <b>Cellular imatinib uptake</b> | <b>Reference</b>       | <b>Cell type</b>                                                                | <b>Number of patients</b> | <b>Effects on imatinib response</b>                                                                                                                                                                                                            |                                                 | <b>Significant association</b> |
|                                 | White et al. (18)      | PB MNC                                                                          | 56                        | Higher cellular imatinib uptake associated with higher rates of achieving MMR and CMR by 2 years of imatinib treatment                                                                                                                         |                                                 | Yes                            |
|                                 | White et al. (19)      | PB MNC                                                                          | 56                        | Higher cellular imatinib uptake associated with higher rates of achieving MMR and CMR by 5 years of imatinib treatment                                                                                                                         |                                                 | Yes                            |

|  |                    |                   |     |                                                                                                                  |     |
|--|--------------------|-------------------|-----|------------------------------------------------------------------------------------------------------------------|-----|
|  | Engler et al. (22) | PB MNC            | 34  | Higher cellular imatinib uptake associated with higher rates of achieving MMR by 12 months of imatinib treatment | Yes |
|  | Engler et al. (22) | CD34 <sup>+</sup> | 34  | Cellular imatinib uptake not associated with MMR by 12 months of imatinib treatment                              | No  |
|  | White et al. (23)  | PB MNC            | 100 | Higher cellular imatinib uptake associated with higher rates of achieving MMR by 2 years of imatinib treatment   | Yes |

BM MNC, bone marrow mononuclear cells

CCR, complete cytogenetic response

CMR, complete molecular response

CP, chronic phase

MMR, major molecular response

PBC, peripheral blood cells

PB MNC, peripheral blood mononuclear cells

## Supplementary Table S2

Multiple reaction monitoring (MRM) transitions and MS parameters for determination of imatinib, *N*-desmethyl imatinib and their internal standards with LC-MS-MS

| Analyte                                     | MRM transition ( <i>m/z</i> ) | Dwell time (ms) | Fragmentor (V) | Collision energy (V) |
|---------------------------------------------|-------------------------------|-----------------|----------------|----------------------|
| Imatinib                                    | 494.3 > 394.1                 | 50              | 162            | 22                   |
| Imatinib-d <sub>8</sub>                     | 502.3 > 394.1                 | 50              | 162            | 22                   |
| <i>N</i> -Desmethyl imatinib                | 480.3 > 394.1                 | 50              | 165            | 22                   |
| <i>N</i> -Desmethyl imatinib-d <sub>8</sub> | 488.3 > 394.1                 | 50              | 165            | 22                   |

### Supplementary Table S3

Characteristics of SLC family members whose mRNA expression has been quantified by real-time PCR in the present study. SLC transporters (24) were selected based on the core and extended list of the PharmaADME Consortium (<http://www.pharmaadme.org>) and are considered as important for drug uptake

| SLC family | Family name                                                    | Investigated family members                                                                                                                                                 | Selected drug substrates                                                                 |
|------------|----------------------------------------------------------------|-----------------------------------------------------------------------------------------------------------------------------------------------------------------------------|------------------------------------------------------------------------------------------|
| SLC2       | Facilitative GLUT transporter                                  | SLC2A4, SLC2A5                                                                                                                                                              |                                                                                          |
| SLC5       | Sodium glucose transporter                                     | SLC5A8, SLC5A12                                                                                                                                                             | Nicotinate                                                                               |
| SLC6       | Sodium- and chloride-dependent neurotransmitter transporter    | SLC6A6                                                                                                                                                                      | Paroxetine, fluoxetine                                                                   |
| SLC7       | Cationic aminotransferase transporter/ glycoprotein-associated | SLC7A5                                                                                                                                                                      | Gabapentin                                                                               |
| SLC10      | Sodium bile salt cotransport                                   | SLC10A1, SLC10A2                                                                                                                                                            | Bile acid-coupled cytostatic drugs, statins                                              |
| SLC15      | Proton oligopeptide cotransporter                              | SLC15A1, SLC15A2, SLC15A3, SLC15A4                                                                                                                                          | $\beta$ -lactam antibiotics                                                              |
| SLC16      | Monocarboxylate transporter                                    | SLC16A1, SLC16A3, SLC16A7                                                                                                                                                   | Salicylate, statins                                                                      |
| SLC19      | Folate/thiaminotransferase transporter                         | SLC19A1                                                                                                                                                                     | Methotrexate                                                                             |
| SLCO       | Organic anion transporter                                      | SLCO1A2, SLCO1B1, SLCO1B3, SLCO1C1, SLCO2A1, SLCO2B1, SLCO3A1, SLCO4A1, SLCO4C1, SLCO5A1, SLCO6A1                                                                           | Benzylpenicillin, methotrexate, paclitaxel, rifampicin, statins, troglitazone, valsartan |
| SLC22      | Organic cation/anion/zwitterion transporter                    | SLC22A1, SLC22A2, SLC22A3, SLC22A4, SLC22A5, SLC22A6, SLC22A7, SLC22A8, SLC22A9, SLC22A11, SLC22A12, SLC22A13, SLC22A14, SLC22A15, SLC22A16, SLC22A17, SLC22A18, SLC22A18AS | Antiviral drugs, metformin, methotrexate, platinum compounds                             |
| SLC27      | Fatty acid transporter                                         | SLC27A1                                                                                                                                                                     |                                                                                          |

|       |                                                 |                                    |                                                |
|-------|-------------------------------------------------|------------------------------------|------------------------------------------------|
| SLC28 | Na <sup>+</sup> -coupled nucleoside transporter | SLC28A1, SLC28A2, SLC28A3          | Antiviral drugs, gemcitabine                   |
| SLC29 | Facilitative nucleoside transporter             | SLC29A1, SLC29A2, SLC29A3, SLC29A4 | Antiviral drugs, gemcitabine                   |
| SLC47 | Multidrug and Toxin Extrusion (MATE)            | SLC47A1, SLC47A2                   | Antiviral drugs, metformin, platinum compounds |

## References

1. Zach O, Krieger O, Foedermayr M, Zellhofer B, Lutz D. OCT1 (SLC22A1) R61C polymorphism and response to imatinib treatment in chronic myeloid leukemia patients. *Leuk Lymphoma* 2008;49:2222-3.
2. Kim DH, Sriharsha L, Xu W, Kamel-Reid S, Liu X, Siminovitch K, et al. Clinical relevance of a pharmacogenetic approach using multiple candidate genes to predict response and resistance to imatinib therapy in chronic myeloid leukemia. *Clin Cancer Res* 2009;15:4750-8.
3. Gromicho M, Magalhaes M, Torres F, Dinis J, Fernandes AR, Rendeiro P, et al. Instability of mRNA expression signatures of drug transporters in chronic myeloid leukemia patients resistant to imatinib. *Oncol Rep* 2012;29:741-50.
4. Bazeos A, Marin D, Reid AG, Gerrard G, Milojkovic D, May PC, et al. hOCT1 transcript levels and single nucleotide polymorphisms as predictive factors for response to imatinib in chronic myeloid leukemia. *Leukemia* 2010;24:1243-5.
5. Takahashi N, Miura M, Scott SA, Kagaya H, Kameoka Y, Tagawa H, et al. Influence of CYP3A5 and drug transporter polymorphisms on imatinib trough concentration and clinical response among patients with chronic phase chronic myeloid leukemia. *J Hum Genet* 2010;55:731-7.
6. White DL, Saunders VA, Dang P, Engler J, Hughes TP. OCT-1 activity measurement provides a superior imatinib response predictor than screening for single-nucleotide polymorphisms of OCT-1. *Leukemia* 2010;24:1962-5.
7. Maffioli M, Camos M, Gaya A, Hernandez-Boluda JC, Alvarez-Larran A, Domingo A, et al. Correlation between genetic polymorphisms of the hOCT1 and MDR1 genes and the response to imatinib in patients newly diagnosed with chronic-phase chronic myeloid leukemia. *Leuk Res* 2011;35:1014-9.
8. Giannoudis A, Wang L, Jorgensen AL, Xinarianos G, Davies A, Pushpakom S, et al. The hOCT1 SNPs M420del and M408V alter imatinib uptake and M420del modifies clinical outcome in imatinib-treated chronic myeloid leukaemia. *Blood* 2013;121:628-37.
9. Angelini S, Soverini S, Ravegnini G, Barnett M, Turrini E, Thornquist M, et al. Association between imatinib transporters and metabolizing enzymes genotype and response in newly diagnosed chronic myeloid leukemia patients receiving imatinib therapy. *Haematologica* 2013;98:193-200.
10. Seong SJ, Lim M, Sohn SK, Moon JH, Oh SJ, Kim BS, et al. Influence of enzyme and transporter polymorphisms on trough imatinib concentration and clinical response in chronic myeloid leukemia patients. *Ann Oncol* 2013;24:756-60.
11. Nambu T, Hamada A, Nakashima R, Yuki M, Kawaguchi T, Mitsuya H, et al. Association of SLCO1B3 polymorphism with intracellular accumulation of imatinib in leukocytes in patients with chronic myeloid leukemia. *Biol Pharm Bull* 2011;34:114-9.
12. Yamakawa Y, Hamada A, Nakashima R, Yuki M, Hirayama C, Kawaguchi T, et al. Association of Genetic Polymorphisms in the Influx Transporter SLCO1B3 and the Efflux Transporter



- ABCB1 With Imatinib Pharmacokinetics in Patients With Chronic Myeloid Leukemia. *Ther Drug Monit* 2011;33:244-50.
13. Singh O, Chan JY, Lin K, Heng CC, Chowbay B. SLC22A1-ABCB1 Haplotype Profiles Predict Imatinib Pharmacokinetics in Asian Patients with Chronic Myeloid Leukemia. *PLoS ONE* 2012;7:e51771.
  14. Crossman LC, Druker BJ, Deininger MW, Pirmohamed M, Wang L, Clark RE. hOCT 1 and resistance to imatinib. *Blood* 2005;106:1133-4.
  15. Wang L, Giannoudis A, Lane S, Williamson P, Pirmohamed M, Clark RE. Expression of the uptake drug transporter hOCT1 is an important clinical determinant of the response to imatinib in chronic myeloid leukemia. *Clin Pharmacol Ther* 2008;83:258-64.
  16. Zhang WW, Cortes JE, Yao H, Zhang L, Reddy NG, Jabbour E, et al. Predictors of primary imatinib resistance in chronic myelogenous leukemia are distinct from those in secondary imatinib resistance. *J Clin Oncol* 2009;27:3642-9.
  17. Marin D, Bazeos A, Mahon FX, Eliasson L, Milojkovic D, Bua M, et al. Adherence is the critical factor for achieving molecular responses in patients with chronic myeloid leukemia who achieve complete cytogenetic responses on imatinib. *J Clin Oncol* 2010;28:2381-8.
  18. White DL, Saunders VA, Dang P, Engler J, Venables A, Zrim S, et al. Most CML patients who have a suboptimal response to imatinib have low OCT-1 activity: higher doses of imatinib may overcome the negative impact of low OCT-1 activity. *Blood* 2007;110:4064-72.
  19. White DL, Dang P, Engler J, Frede A, Zrim S, Osborn M, et al. Functional activity of the OCT-1 protein is predictive of long-term outcome in patients with chronic-phase chronic myeloid leukemia treated with imatinib. *J Clin Oncol* 2010;28:2761-7.
  20. Zhong JS, Meng FY, Xu D, Zhou HS, Dai M. Correlation between imatinib trough concentration and efficacy in Chinese chronic myelocytic leukemia patients. *Acta Haematol* 2012;127:221-7.
  21. Nardinelli L, Sanabani SS, Didone A, Ferreira PB, Serpa M, Novaes MM, et al. Pretherapeutic expression of the hOCT1 gene predicts a complete molecular response to imatinib mesylate in chronic-phase chronic myeloid leukemia. *Acta Haematol* 2012;127:228-34.
  22. Engler JR, Frede A, Saunders V, Zannettino A, White DL, Hughes TP. The poor response to imatinib observed in CML patients with low OCT-1 activity is not attributable to lower uptake of imatinib into their CD34+ cells. *Blood* 2010;116:2776-8.
  23. White DL, Radich J, Soverini S, Saunders VA, Frede AK, Dang P, et al. Chronic phase chronic myeloid leukemia patients with low OCT-1 activity randomized to high-dose imatinib achieve better responses and have lower failure rates than those randomized to standard-dose imatinib. *Haematologica* 2012;97:907-14.
  24. Hediger MA, Clemencon B, Burrier RE, Bruford EA. The ABCs of membrane transporters in health and disease (SLC series): Introduction. *Mol Aspects Med* 2013;34:95-107.
